# Supplementary material for: Gene Expression Deconvolution for Uncovering Molecular Signatures in Response to Therapy in Juvenile Idiopathic Arthritis
Source: PubMed Central journal article supplement (PMC4887077; doi:10.1371/journal.pone.0156055), 2016-05-31

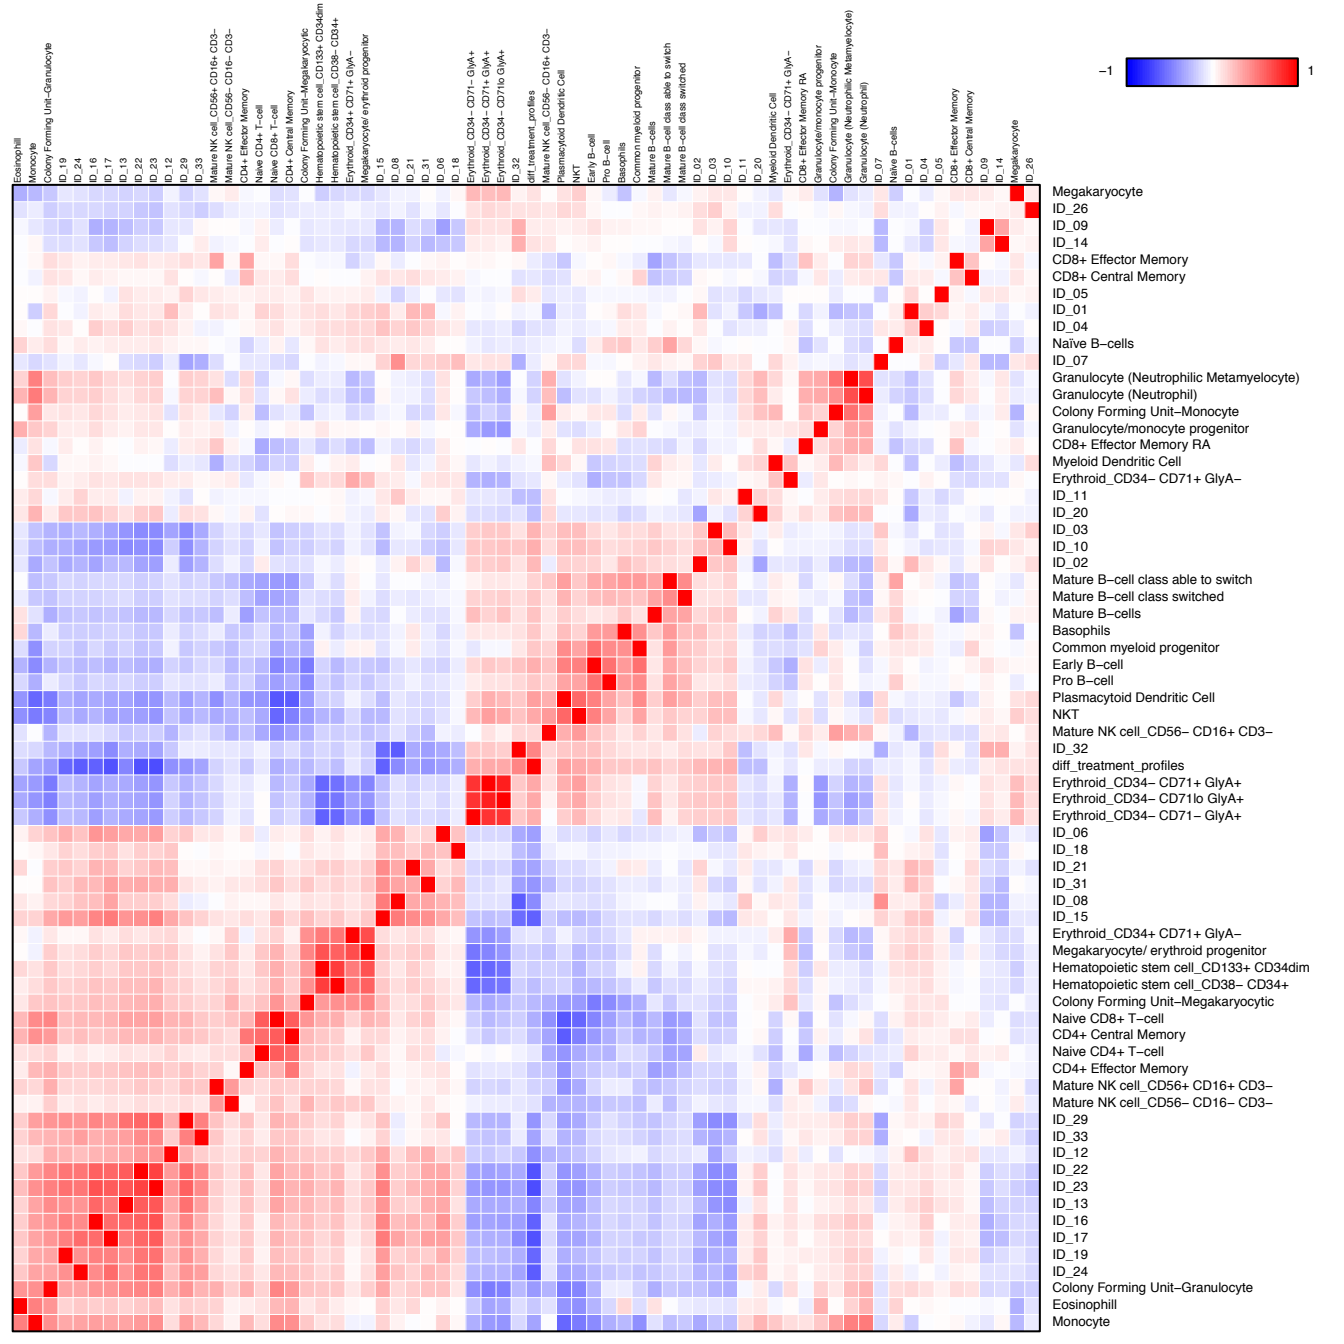

Supplement: pone.0156055.s002.pdf [file pone.0156055.s002.pdf]
