# Supplementary material for: Gene Expression Deconvolution for Uncovering Molecular Signatures in Response to Therapy in Juvenile Idiopathic Arthritis
Source: PubMed Central journal article supplement (PMC4887077; doi:10.1371/journal.pone.0156055), 2016-05-31
Supplement: pone.0156055.s003.pdf [file pone.0156055.s003.pdf]

## **MATLAB script to run ISOpure-S1**

% ISOpure-S1 code can be obtained from <https://github.com/gquon/ISOpure>

% INPUT:

% PP: a  $G \times N$  matrix representing gene expression profiles of post-treatment samples, where  $G$  is the number of genes and  $N$  is the number of subjects.

% BB: a  $G \times M$  matrix representing gene expression profiles of pre-treatment samples, where  $M$  is the number of subjects in pre-treatment samples.

% OUTPUT:

% loglikelihood: log likelihood of the final model

% S1model: a structure with the following important fields:

% S1model.theta: an  $N \times (M+1)$  matrix, giving the fractional composition of each post-treatment profile. Each row represents a post-treatment sample that was part of the input. The first  $M$  columns correspond to the fractional compositions with respect to the pre-treatment profiles. The last column represents the fractional composition of the treatment-response profile.

% S1model.alphapurities: an  $N \times 1$  vector representing the proportion of treatment response (same as the last column of the theta variable; pulled out for user convenience).

% S1model.mm: a  $G \times 1$  vector representing the treatment-response profile, in the form of parameters of a multinomial or discrete distribution (sum of elements is 1).

% S1model.omega: an  $M \times 1$  vector describing the convex combination weights learned by ISOpureS1 over the BB matrix that form the prior over the treatment-response profile.

% S1model.PPtranspose: transpose of the normalized BB matrix such that the weights of  $G$  genes sum to 1 for each sample

% The following code assumes the variables are already loaded: BB, PP (see above), genes (vector of IDs of genes corresponding to the rows of PP and BB)

% Add ISOpure-S1 to user library

addpath(genpath('<path to ISOpureS1>'))

% Run ISOpure-S1

[S1model loglikelihood] = learnmodel(PP, BB)

% Output 1: a single treatment-response profile common to all patients

S1model.mm

% Output 2: a % treatment-response estimate for each post-treatment expression profile

S1model.alphapurities

% Output 3: a single delta profile that captures the difference between the treatment-response profile and the pre-treatment profiles

```
deltaprofile = log2(S1model.mm)-log2(S1model.PPtranspose' * S1model.omega)
```

% Output 4: a list of genes predicted to be differentially expressed under treatment in the delta profile

```
[result sorted_overexpr_ix] = sort(deltaprofile, 'descend');
```

```
sorted_genes = genes(sorted_overexpr_ix); % where "genes" is a vector containing gene symbols
```

```
CUTOFF = 100;
```

```
up_reg_genes = sorted_genes(1:CUTOFF)
```

```
down_reg_genes = sorted_genes(size(sorted_genes,1)-CUTOFF+1:size(sorted_genes,1))
```
