# Supplementary material for: Gene Expression Deconvolution for Uncovering Molecular Signatures in Response to Therapy in Juvenile Idiopathic Arthritis
Source: PubMed Central journal article supplement (PMC4887077; doi:10.1371/journal.pone.0156055), 2016-05-31
Supplement: pone.0156055.s004.pdf [file pone.0156055.s004.pdf]

DAVID functional enrichment analysis with the top 100 down- and up-regulated genes

Down-regulated genes:

| Sublist                  | Category      | Term                                                                          | RT                 | Genes                                                                                 | Count | %   | P-Value | Benjamini |
|--------------------------|---------------|-------------------------------------------------------------------------------|--------------------|---------------------------------------------------------------------------------------|-------|-----|---------|-----------|
| <input type="checkbox"/> | GOTERM_BP_FAT | <a href="#">defense response to bacterium</a>                                 | <a href="#">RT</a> |    | 8     | 1.2 | 1.6E-6  | 1.3E-3    |
| <input type="checkbox"/> | GOTERM_BP_FAT | <a href="#">response to bacterium</a>                                         | <a href="#">RT</a> |    | 8     | 1.2 | 5.5E-5  | 2.2E-2    |
| <input type="checkbox"/> | GOTERM_BP_FAT | <a href="#">immune response</a>                                               | <a href="#">RT</a> |    | 13    | 1.9 | 1.7E-4  | 4.6E-2    |
| <input type="checkbox"/> | KEGG_PATHWAY  | <a href="#">Hematopoietic cell lineage</a>                                    | <a href="#">RT</a> |    | 5     | 0.7 | 7.4E-4  | 4.8E-2    |
| <input type="checkbox"/> | GOTERM_BP_FAT | <a href="#">defense response to fungus</a>                                    | <a href="#">RT</a> |    | 3     | 0.4 | 1.9E-3  | 3.3E-1    |
| <input type="checkbox"/> | GOTERM_BP_FAT | <a href="#">killing of cells of another organism</a>                          | <a href="#">RT</a> |    | 3     | 0.4 | 2.2E-3  | 3.1E-1    |
| <input type="checkbox"/> | GOTERM_BP_FAT | <a href="#">defense response</a>                                              | <a href="#">RT</a> |    | 10    | 1.5 | 3.9E-3  | 4.1E-1    |
| <input type="checkbox"/> | GOTERM_BP_FAT | <a href="#">cell killing</a>                                                  | <a href="#">RT</a> |    | 3     | 0.4 | 6.6E-3  | 5.4E-1    |
| <input type="checkbox"/> | GOTERM_BP_FAT | <a href="#">response to fungus</a>                                            | <a href="#">RT</a> |    | 3     | 0.4 | 6.6E-3  | 5.4E-1    |
| <input type="checkbox"/> | GOTERM_BP_FAT | <a href="#">positive regulation of locomotion</a>                             | <a href="#">RT</a> |    | 4     | 0.6 | 1.4E-2  | 7.6E-1    |
| <input type="checkbox"/> | GOTERM_BP_FAT | <a href="#">regulation of locomotion</a>                                      | <a href="#">RT</a> |    | 5     | 0.7 | 1.7E-2  | 7.8E-1    |
| <input type="checkbox"/> | GOTERM_BP_FAT | <a href="#">response to virus</a>                                             | <a href="#">RT</a> |    | 4     | 0.6 | 1.8E-2  | 7.8E-1    |
| <input type="checkbox"/> | GOTERM_MF_FAT | <a href="#">antigen binding</a>                                               | <a href="#">RT</a> |  | 3     | 0.4 | 2.1E-2  | 9.9E-1    |
| <input type="checkbox"/> | KEGG_PATHWAY  | <a href="#">Intestinal immune network for IgA production</a>                  | <a href="#">RT</a> |  | 3     | 0.4 | 2.4E-2  | 5.5E-1    |
| <input type="checkbox"/> | GOTERM_MF_FAT | <a href="#">copper ion binding</a>                                            | <a href="#">RT</a> |  | 3     | 0.4 | 3.1E-2  | 9.6E-1    |
| <input type="checkbox"/> | GOTERM_BP_FAT | <a href="#">membrane organization</a>                                         | <a href="#">RT</a> |  | 6     | 0.9 | 4.5E-2  | 9.7E-1    |
| <input type="checkbox"/> | GOTERM_BP_FAT | <a href="#">defense response to Gram-negative bacterium</a>                   | <a href="#">RT</a> |  | 2     | 0.3 | 5.0E-2  | 9.7E-1    |
| <input type="checkbox"/> | GOTERM_MF_FAT | <a href="#">carbohydrate binding</a>                                          | <a href="#">RT</a> |  | 5     | 0.7 | 5.3E-2  | 9.8E-1    |
| <input type="checkbox"/> | GOTERM_BP_FAT | <a href="#">regulation of cell migration</a>                                  | <a href="#">RT</a> |  | 4     | 0.6 | 5.5E-2  | 9.7E-1    |
| <input type="checkbox"/> | GOTERM_MF_FAT | <a href="#">oxidoreductase activity, acting on the CH-NH2 group of donors</a> | <a href="#">RT</a> |  | 2     | 0.3 | 7.0E-2  | 9.8E-1    |
| <input type="checkbox"/> | GOTERM_BP_FAT | <a href="#">positive regulation of cell migration</a>                         | <a href="#">RT</a> |  | 3     | 0.4 | 7.6E-2  | 9.9E-1    |
| <input type="checkbox"/> | GOTERM_BP_FAT | <a href="#">regulation of cell motion</a>                                     | <a href="#">RT</a> |  | 4     | 0.6 | 7.6E-2  | 9.9E-1    |

|                          |               |                                                            |    |  |   |     |        |        |
|--------------------------|---------------|------------------------------------------------------------|----|--|---|-----|--------|--------|
| <input type="checkbox"/> | GOTERM_BP_FAT | <a href="#">amino acid transport</a>                       | RT |  | 3 | 0.4 | 7.7E-2 | 9.8E-1 |
| <input type="checkbox"/> | GOTERM_MF_FAT | <a href="#">neurotransmitter:sodium symporter activity</a> | RT |  | 2 | 0.3 | 7.7E-2 | 9.7E-1 |
| <input type="checkbox"/> | GOTERM_BP_FAT | <a href="#">positive regulation of cell motion</a>         | RT |  | 3 | 0.4 | 8.9E-2 | 9.9E-1 |
| <input type="checkbox"/> | GOTERM_MF_FAT | <a href="#">neurotransmitter transporter activity</a>      | RT |  | 2 | 0.3 | 9.2E-2 | 9.7E-1 |

### Up-regulated genes:

| Sublist                  | Category      | Term                                                                 | RT | Genes | Count | %   | P-Value | Benjamini |
|--------------------------|---------------|----------------------------------------------------------------------|----|-------|-------|-----|---------|-----------|
| <input type="checkbox"/> | GOTERM_BP_FAT | <a href="#">anti-apoptosis</a>                                       | RT |       | 8     | 1.0 | 7.6E-5  | 9.1E-2    |
| <input type="checkbox"/> | GOTERM_BP_FAT | <a href="#">inflammatory response</a>                                | RT |       | 9     | 1.1 | 2.1E-4  | 1.3E-1    |
| <input type="checkbox"/> | GOTERM_BP_FAT | <a href="#">positive regulation of cell communication</a>            | RT |       | 9     | 1.1 | 2.3E-4  | 9.3E-2    |
| <input type="checkbox"/> | GOTERM_BP_FAT | <a href="#">response to wounding</a>                                 | RT |       | 11    | 1.3 | 2.9E-4  | 8.9E-2    |
| <input type="checkbox"/> | GOTERM_BP_FAT | <a href="#">regulation of apoptosis</a>                              | RT |       | 13    | 1.6 | 6.0E-4  | 1.4E-1    |
| <input type="checkbox"/> | GOTERM_BP_FAT | <a href="#">regulation of programmed cell death</a>                  | RT |       | 13    | 1.6 | 6.5E-4  | 1.3E-1    |
| <input type="checkbox"/> | GOTERM_BP_FAT | <a href="#">regulation of cell death</a>                             | RT |       | 13    | 1.6 | 6.7E-4  | 1.1E-1    |
| <input type="checkbox"/> | GOTERM_BP_FAT | <a href="#">defense response</a>                                     | RT |       | 11    | 1.3 | 9.4E-4  | 1.4E-1    |
| <input type="checkbox"/> | GOTERM_BP_FAT | <a href="#">positive regulation of response to stimulus</a>          | RT |       | 7     | 0.9 | 1.2E-3  | 1.5E-1    |
| <input type="checkbox"/> | GOTERM_BP_FAT | <a href="#">regulation of response to external stimulus</a>          | RT |       | 6     | 0.7 | 1.2E-3  | 1.4E-1    |
| <input type="checkbox"/> | GOTERM_BP_FAT | <a href="#">positive regulation of immune system process</a>         | RT |       | 7     | 0.9 | 1.2E-3  | 1.3E-1    |
| <input type="checkbox"/> | GOTERM_BP_FAT | <a href="#">response to oxidative stress</a>                         | RT |       | 6     | 0.7 | 1.4E-3  | 1.4E-1    |
| <input type="checkbox"/> | GOTERM_BP_FAT | <a href="#">positive regulation of MAP kinase activity</a>           | RT |       | 5     | 0.6 | 1.7E-3  | 1.5E-1    |
| <input type="checkbox"/> | GOTERM_BP_FAT | <a href="#">negative regulation of apoptosis</a>                     | RT |       | 8     | 1.0 | 2.0E-3  | 1.6E-1    |
| <input type="checkbox"/> | GOTERM_BP_FAT | <a href="#">response to protein stimulus</a>                         | RT |       | 5     | 0.6 | 2.0E-3  | 1.6E-1    |
| <input type="checkbox"/> | GOTERM_BP_FAT | <a href="#">positive regulation of cellular biosynthetic process</a> | RT |       | 11    | 1.3 | 2.1E-3  | 1.5E-1    |
| <input type="checkbox"/> | GOTERM_BP_FAT | <a href="#">negative regulation of programmed cell death</a>         | RT |       | 8     | 1.0 | 2.1E-3  | 1.4E-1    |

| Sublist                  | Category      | Term                                                                    | RT | Genes | Count | %   | P-Value | Benjamini |
|--------------------------|---------------|-------------------------------------------------------------------------|----|-------|-------|-----|---------|-----------|
| <input type="checkbox"/> | GOTERM_BP_FAT | <a href="#">negative regulation of cell death</a>                       | RT |       | 8     | 1.0 | 2.1E-3  | 1.4E-1    |
| <input type="checkbox"/> | GOTERM_BP_FAT | <a href="#">positive regulation of biosynthetic process</a>             | RT |       | 11    | 1.3 | 2.3E-3  | 1.4E-1    |
| <input type="checkbox"/> | GOTERM_BP_FAT | <a href="#">response to abiotic stimulus</a>                            | RT |       | 8     | 1.0 | 2.4E-3  | 1.4E-1    |
| <input type="checkbox"/> | GOTERM_BP_FAT | <a href="#">protein kinase cascade</a>                                  | RT |       | 8     | 1.0 | 2.5E-3  | 1.4E-1    |
| <input type="checkbox"/> | GOTERM_BP_FAT | <a href="#">response to organic substance</a>                           | RT |       | 11    | 1.3 | 3.1E-3  | 1.6E-1    |
| <input type="checkbox"/> | GOTERM_BP_FAT | <a href="#">response to radiation</a>                                   | RT |       | 6     | 0.7 | 3.3E-3  | 1.7E-1    |
| <input type="checkbox"/> | GOTERM_BP_FAT | <a href="#">positive regulation of macromolecule metabolic process</a>  | RT |       | 12    | 1.5 | 3.4E-3  | 1.6E-1    |
| <input type="checkbox"/> | GOTERM_BP_FAT | <a href="#">positive regulation of signal transduction</a>              | RT |       | 7     | 0.9 | 3.6E-3  | 1.7E-1    |
| <input type="checkbox"/> | GOTERM_BP_FAT | <a href="#">response to inorganic substance</a>                         | RT |       | 6     | 0.7 | 3.7E-3  | 1.6E-1    |
| <input type="checkbox"/> | GOTERM_BP_FAT | <a href="#">positive regulation of response to external stimulus</a>    | RT |       | 4     | 0.5 | 4.1E-3  | 1.7E-1    |
| <input type="checkbox"/> | GOTERM_BP_FAT | <a href="#">positive regulation of catalytic activity</a>               | RT |       | 9     | 1.1 | 4.4E-3  | 1.8E-1    |
| <input type="checkbox"/> | GOTERM_BP_FAT | <a href="#">cytokine-mediated signaling pathway</a>                     | RT |       | 4     | 0.5 | 5.2E-3  | 2.0E-1    |
| <input type="checkbox"/> | GOTERM_BP_FAT | <a href="#">regulation of MAP kinase activity</a>                       | RT |       | 5     | 0.6 | 5.5E-3  | 2.1E-1    |
| <input type="checkbox"/> | GOTERM_BP_FAT | <a href="#">response to gamma radiation</a>                             | RT |       | 3     | 0.4 | 5.9E-3  | 2.1E-1    |
| <input type="checkbox"/> | GOTERM_BP_FAT | <a href="#">response to reactive oxygen species</a>                     | RT |       | 4     | 0.5 | 6.3E-3  | 2.2E-1    |
| <input type="checkbox"/> | GOTERM_BP_FAT | <a href="#">response to cytokine stimulus</a>                           | RT |       | 4     | 0.5 | 7.3E-3  | 2.4E-1    |
| <input type="checkbox"/> | GOTERM_BP_FAT | <a href="#">positive regulation of multicellular organismal process</a> | RT |       | 6     | 0.7 | 7.6E-3  | 2.5E-1    |
| <input type="checkbox"/> | GOTERM_BP_FAT | <a href="#">activation of MAPK activity</a>                             | RT |       | 4     | 0.5 | 8.1E-3  | 2.5E-1    |
| <input type="checkbox"/> | GOTERM_BP_FAT | <a href="#">regulation of protein kinase cascade</a>                    | RT |       | 6     | 0.7 | 8.2E-3  | 2.5E-1    |
| <input type="checkbox"/> | GOTERM_BP_FAT | <a href="#">positive regulation of molecular function</a>               | RT |       | 9     | 1.1 | 8.9E-3  | 2.6E-1    |
| <input type="checkbox"/> | GOTERM_BP_FAT | <a href="#">response to molecule of bacterial origin</a>                | RT |       | 4     | 0.5 | 9.2E-3  | 2.6E-1    |
| <input type="checkbox"/> | GOTERM_BP_FAT | <a href="#">positive regulation of chemotaxis</a>                       | RT |       | 3     | 0.4 | 9.3E-3  | 2.6E-1    |
| <input type="checkbox"/> | GOTERM_BP_FAT | <a href="#">regulation of cellular protein metabolic process</a>        | RT |       | 8     | 1.0 | 9.5E-3  | 2.6E-1    |
| <input type="checkbox"/> | GOTERM_BP_FAT | <a href="#">regulation of leukocyte activation</a>                      | RT |       | 5     | 0.6 | 9.7E-3  | 2.6E-1    |

| Sublist                  | Category      | Term                                                                       | RT | Genes | Count | %   | P-Value | Benjamini |
|--------------------------|---------------|----------------------------------------------------------------------------|----|-------|-------|-----|---------|-----------|
| <input type="checkbox"/> | GOTERM_BP_FAT | <a href="#">positive regulation of protein kinase cascade</a>              | RT |       | 5     | 0.6 | 9.9E-3  | 2.6E-1    |
| <input type="checkbox"/> | GOTERM_BP_FAT | <a href="#">positive regulation of anti-apoptosis</a>                      | RT |       | 3     | 0.4 | 9.9E-3  | 2.5E-1    |
| <input type="checkbox"/> | GOTERM_BP_FAT | <a href="#">regulation of chemotaxis</a>                                   | RT |       | 3     | 0.4 | 1.1E-2  | 2.6E-1    |
| <input type="checkbox"/> | GOTERM_BP_FAT | <a href="#">negative regulation of macromolecule metabolic process</a>     | RT |       | 10    | 1.2 | 1.1E-2  | 2.6E-1    |
| <input type="checkbox"/> | GOTERM_BP_FAT | <a href="#">cellular ion homeostasis</a>                                   | RT |       | 7     | 0.9 | 1.1E-2  | 2.6E-1    |
| <input type="checkbox"/> | GOTERM_BP_FAT | <a href="#">mitochondrial membrane organization</a>                        | RT |       | 3     | 0.4 | 1.1E-2  | 2.6E-1    |
| <input type="checkbox"/> | GOTERM_BP_FAT | <a href="#">regulation of cell activation</a>                              | RT |       | 5     | 0.6 | 1.2E-2  | 2.6E-1    |
| <input type="checkbox"/> | GOTERM_BP_FAT | <a href="#">cellular chemical homeostasis</a>                              | RT |       | 7     | 0.9 | 1.2E-2  | 2.7E-1    |
| <input type="checkbox"/> | GOTERM_BP_FAT | <a href="#">locomotory behavior</a>                                        | RT |       | 6     | 0.7 | 1.2E-2  | 2.6E-1    |
| <input type="checkbox"/> | GOTERM_BP_FAT | <a href="#">positive regulation of behavior</a>                            | RT |       | 3     | 0.4 | 1.3E-2  | 2.7E-1    |
| <input type="checkbox"/> | GOTERM_BP_FAT | <a href="#">negative regulation of cellular protein metabolic process</a>  | RT |       | 5     | 0.6 | 1.3E-2  | 2.7E-1    |
| <input type="checkbox"/> | GOTERM_BP_FAT | <a href="#">positive regulation of developmental process</a>               | RT |       | 6     | 0.7 | 1.3E-2  | 2.6E-1    |
| <input type="checkbox"/> | GOTERM_BP_FAT | <a href="#">regulation of cytokine production</a>                          | RT |       | 5     | 0.6 | 1.3E-2  | 2.6E-1    |
| <input type="checkbox"/> | GOTERM_BP_FAT | <a href="#">negative regulation of protein metabolic process</a>           | RT |       | 5     | 0.6 | 1.4E-2  | 2.8E-1    |
| <input type="checkbox"/> | GOTERM_BP_FAT | <a href="#">cell activation</a>                                            | RT |       | 6     | 0.7 | 1.5E-2  | 2.8E-1    |
| <input type="checkbox"/> | GOTERM_BP_FAT | <a href="#">positive regulation of nitrogen compound metabolic process</a> | RT |       | 9     | 1.1 | 1.5E-2  | 2.8E-1    |
| <input type="checkbox"/> | GOTERM_BP_FAT | <a href="#">regulation of anti-apoptosis</a>                               | RT |       | 3     | 0.4 | 1.6E-2  | 2.9E-1    |
| <input type="checkbox"/> | GOTERM_BP_FAT | <a href="#">regulation of locomotion</a>                                   | RT |       | 5     | 0.6 | 1.6E-2  | 2.9E-1    |
| <input type="checkbox"/> | GOTERM_BP_FAT | <a href="#">positive regulation of leukocyte activation</a>                | RT |       | 4     | 0.5 | 1.6E-2  | 2.9E-1    |
| <input type="checkbox"/> | GOTERM_BP_FAT | <a href="#">regulation of protein modification process</a>                 | RT |       | 6     | 0.7 | 1.6E-2  | 2.9E-1    |
| <input type="checkbox"/> | GOTERM_BP_FAT | <a href="#">positive regulation of macromolecule biosynthetic process</a>  | RT |       | 9     | 1.1 | 1.6E-2  | 2.9E-1    |
| <input type="checkbox"/> | GOTERM_BP_FAT | <a href="#">regulation of cell proliferation</a>                           | RT |       | 10    | 1.2 | 1.7E-2  | 2.8E-1    |
| <input type="checkbox"/> | GOTERM_BP_FAT | <a href="#">ion homeostasis</a>                                            | RT |       | 7     | 0.9 | 1.7E-2  | 2.8E-1    |
| <input type="checkbox"/> | GOTERM_BP_FAT | <a href="#">regulation of MAPKKK cascade</a>                               | RT |       | 4     | 0.5 | 1.7E-2  | 2.9E-1    |

| Sublist                  | Category      | Term                                                   | RT        | Genes                                                                               | Count | %   | P-Value | Benjamini |
|--------------------------|---------------|--------------------------------------------------------|-----------|-------------------------------------------------------------------------------------|-------|-----|---------|-----------|
| <input type="checkbox"/> | GOTERM_BP_FAT | <a href="#">positive regulation of cell activation</a> | <b>RT</b> |  | 4     | 0.5 | 1.8E-2  | 3.0E-1    |
| <input type="checkbox"/> | GOTERM_MF_FAT | <a href="#">structural molecule activity</a>           | <b>RT</b> |  | 9     | 1.1 | 1.9E-2  | 9.9E-1    |
| <input type="checkbox"/> | GOTERM_BP_FAT | <a href="#">response to cAMP</a>                       | <b>RT</b> |  | 3     | 0.4 | 1.9E-2  | 3.0E-1    |
| <input type="checkbox"/> | KEGG_PATHWAY  | <a href="#">Jak-STAT signaling pathway</a>             | <b>RT</b> |  | 5     | 0.6 | 1.9E-2  | 6.4E-1    |
| <input type="checkbox"/> | GOTERM_BP_FAT | <a href="#">cellular response to oxidative stress</a>  | <b>RT</b> |  | 3     | 0.4 | 2.0E-2  | 3.1E-1    |
| <input type="checkbox"/> | GOTERM_BP_FAT | <a href="#">myeloid leukocyte activation</a>           | <b>RT</b> |  | 3     | 0.4 | 2.2E-2  | 3.4E-1    |
| <input type="checkbox"/> | GOTERM_BP_FAT | <a href="#">regulation of behavior</a>                 | <b>RT</b> |  | 3     | 0.4 | 2.2E-2  | 3.4E-1    |
| <input type="checkbox"/> | GOTERM_BP_FAT | <a href="#">cellular response to stress</a>            | <b>RT</b> |  | 8     | 1.0 | 2.3E-2  | 3.4E-1    |
