# Supplementary material for: Gene Expression Deconvolution for Uncovering Molecular Signatures in Response to Therapy in Juvenile Idiopathic Arthritis
Source: PubMed Central journal article supplement (PMC4887077; doi:10.1371/journal.pone.0156055), 2016-05-31
Supplement: pone.0156055.s005.pdf [file pone.0156055.s005.pdf]

**S1 Table. Spearman correlations between clinical indicators of disease activity.**

|                        | <b>PGA</b>           | <b>ESR</b>           | <b># active joints</b> | <b># LRM joints</b> |
|------------------------|----------------------|----------------------|------------------------|---------------------|
| <b>PGA</b>             | --                   | --                   | --                     | --                  |
| <b>ESR</b>             | - 0.002<br>(p=0.993) | --                   | --                     | --                  |
| <b># active joints</b> | - 0.157<br>(p=0.386) | - 0.115<br>(p=0.523) | --                     | --                  |
| <b># LRM joints</b>    | - 0.328<br>(p=0.076) | - 0.269<br>(p=0.150) | 0.696<br>(p=1.9e-5*)   | --                  |

\* p < 0.01
